# Supplementary material for: Rational inert-basal-plane activating design of ultrathin 1T′ phase MoS2 with a MoO3 heterostructure for enhancing hydrogen evolution performances
Source: Royal Society of Chemistry journal article supplement (doi:10.1039/c8nr05270k), 2018-01-01
Supplement: c8nr05270k1.pdf [file c8nr05270k1.pdf]

## Supporting Information

Rational inert-basal-plane activating design of ultrathin 1T' phase MoS<sub>2</sub> with MoO<sub>3</sub> heterstructure for enhancing hydrogen evolution performances

*Xiaoyi Xue,<sup>a</sup> Jianan Zhang,<sup>\*,a,c</sup> Ibrahim Saana Amiinu,<sup>b</sup> Jian Sun,<sup>a</sup> Qun Xu,<sup>\*,a</sup> and Shichun Mu,<sup>\*,b</sup>*

<sup>a</sup>College of Materials Science and Engineering, Zhengzhou University, Zhengzhou 450001, P. R. China. Emails: zjn@zzu.edu.cn (J. N. Zhang) and qunxu@zzu.edu.cn (Q. Xu)

<sup>b</sup>State Key Laboratory of Advanced Technology for Materials Synthesis and Processing, Wuhan University of Technology, Wuhan 430070, P. R. China, E-mail: msc@whut.edu.cn

<sup>c</sup>Key Laboratory of Advanced Energy Materials Chemistry (Ministry of Education), Nankai University, Tianjin 30071, P. R. China

## 1. Theoretical calculation

**Details of calculations:** Density Functional Theory (DFT) computations were conducted using the Cambridge Sequential Total Energy Package (CASTEP) based on the plane wave pseudopotential method.<sup>1</sup> The geometrical structure of the (110) plane of 1T-MoS<sub>2</sub> and the (100) plane of MoO<sub>3</sub> were optimized using the generalized gradient approximation (GGA) methods. The Revised Perdew-Burke-Ernzerhof (RPBE) functional was used to treat the electron exchange correlation (EEC) interactions. The Brillouin zone was sampled using a Monkhorst Pack k-point grid of 3×3×1 and a plane-wave basis set cut-off energy of 400 eV was applied. The cell structures were optimized for energy and force convergence threshold set at 30 meV/Å and 1.0×10<sup>-2</sup> meV, respectively. A self-consistence field of 2.0×10<sup>-6</sup> eV/atom and a vacuum space as large as 15.0 Å were applied to avoid periodic interactions. The ultra-soft pseudopotentials were applied for the valence electrons and ionic core interactions. To mimic the bulk properties, the top surface atomic layers were fully relaxed while the under layers remained constrained.

The Gibbs free energy ( $\Delta G_{H^*}$ ) of chemisorbed hydrogen was calculated as the energy difference between the reactant and reaction product, that is hydrogen-adsorbed on the catalyst system and the free-state catalyst and hydrogen. The final free energy was computed as:

$$\Delta G_{H^*} = E_{\text{total}} + E_{\text{surf}} - \frac{1}{2}E_{\text{H}_2} + \Delta ZPE - T\Delta S$$

where the given symbols represent total energy ( $E_{\text{total}}$ ) for adsorbed system, energy of the pure system ( $E_{\text{surf}}$ ), change in zero-point-energy ( $\Delta E_{\text{ZPE}}$ ), the temperature of the system ( $T$ ), and entropy change ( $\Delta S$ ), respectively. Herein, the vibrational entropy of hydrogen in the adsorbed state is approximated to be negligible such that  $\Delta S_H \approx S_{H^*} - \frac{1}{2}S_{(\text{H}_2)} \approx -\frac{1}{2}S_{(\text{H}_2)}$ , where  $-\frac{1}{2}S_{(\text{H}_2)}$  represents the entropy of hydrogen in the gas phase at standard conditions. The standard  $TS_{(\text{H}_2)}$  is given to be ~0.41 eV for H<sub>2</sub> at 1 atm and 300 K.<sup>2,3</sup>

**Theoretical models:** The correlative models for the catalyst samples were built to simulate 1T-MoS<sub>2</sub>, MoO<sub>3</sub> and their heterostructure as shown in Figure S1-3. Typically, the (100) facet of 1T-MoS<sub>2</sub> was modeled by the slab with layers of Mo-S bonded atoms while the (011) facet was adopted to generate the MoO<sub>3</sub> slab. To create the heterojunction model catalyst, the MoO<sub>3</sub> was laid on the 1T-MoS<sub>2</sub> surface and optimized, and to avoid the effect of lattice mismatch, an interface periodicity of 3×2 supercell for 1T-MoS<sub>2</sub> phase and 2×2 supercell for the MoO<sub>3</sub> phase were applied for creating the simulation model of the heterostructure. The lattice parameters for all model structures are given in Table S2. The optimized structure of 1T-MoS<sub>2</sub>@MoO<sub>x</sub> displays a slight distortion of the 1T-phase of MoS<sub>2</sub> facet after integrating the MoO<sub>3</sub> layer, resulting in a quasi-1T-MoS<sub>2</sub> phase in the heterostructure (1T'-MoS<sub>2</sub>/MoO<sub>x</sub>).

## 2. Supplementary Figures and Tables

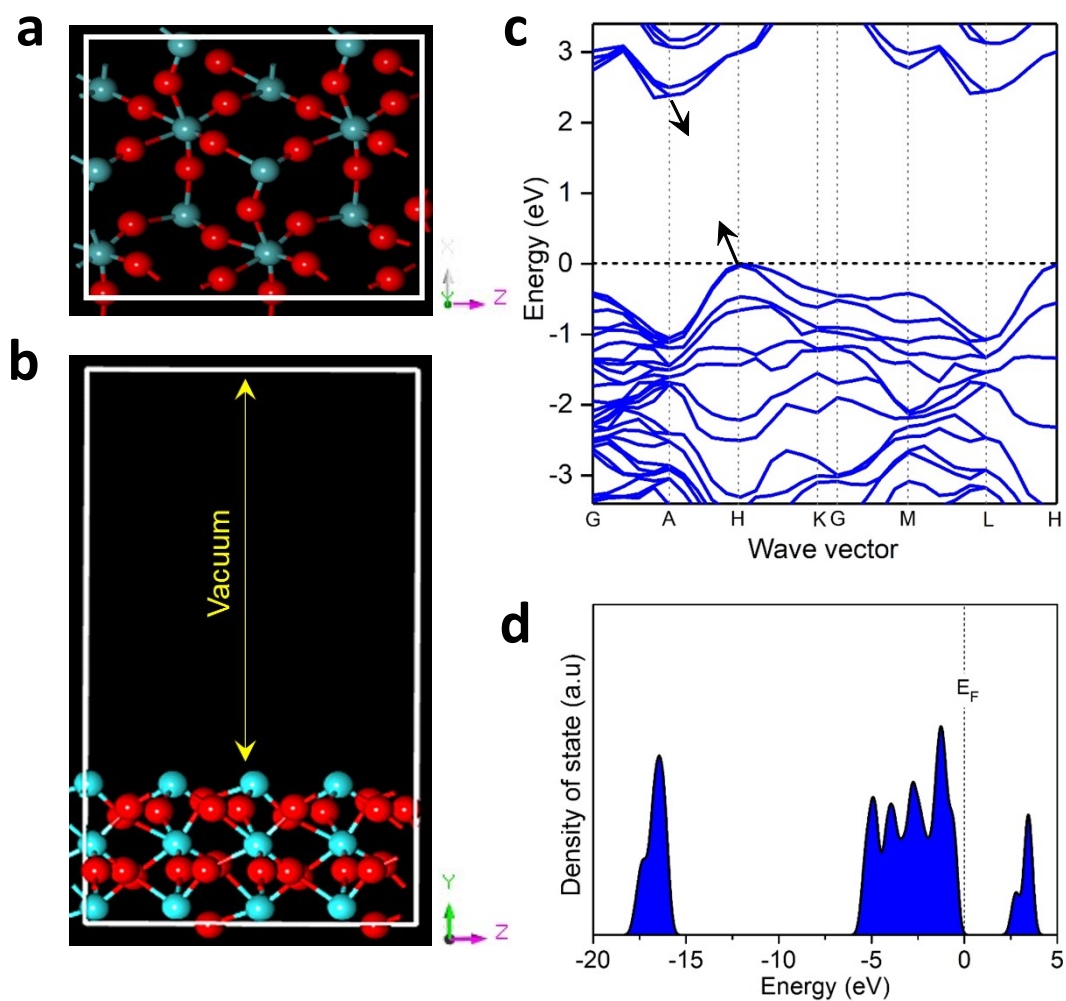

**Figure S1.** Structural model (a) top view and (b) side view, (c) band structure,  $E_g \sim 2.36$  eV, and (d) density of state of MoO<sub>3</sub>. Atoms are O (red) and Mo (cyan).

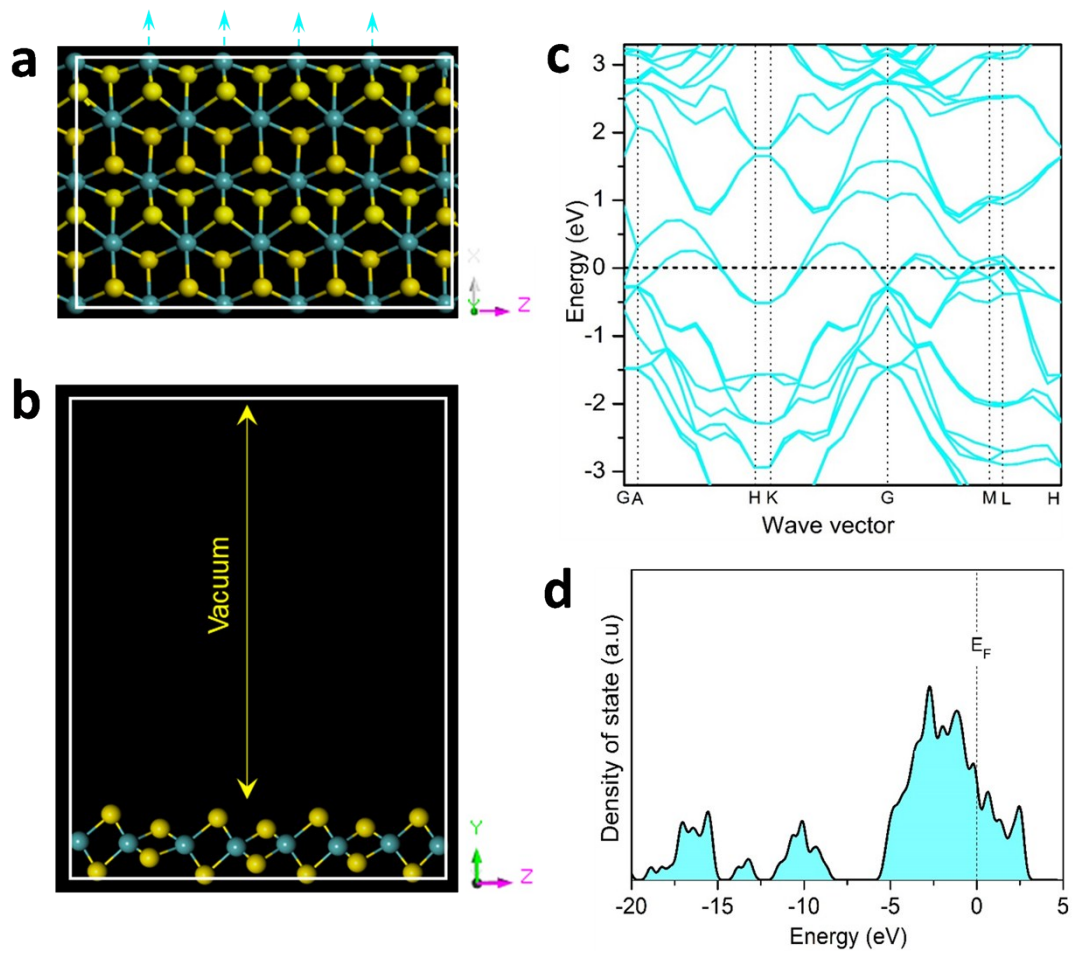

**Figure S2.** Structural model (a) top view and (d) side view, (c) band structure,  $E_g = 0.00$  eV, and (d) density of state of 1T-MoS<sub>2</sub>. Atoms are S (yellow) and Mo (aqua).

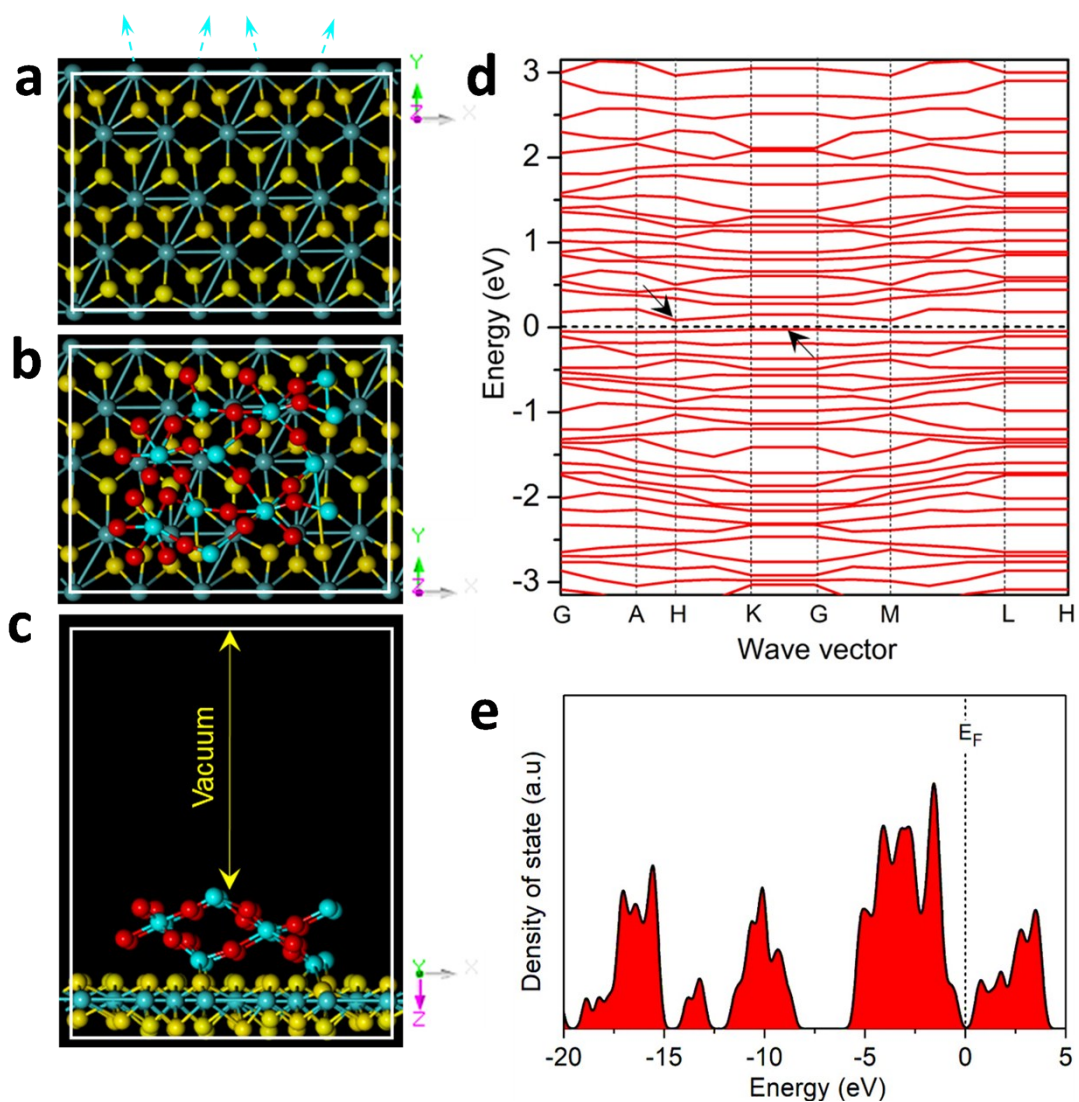

**Figure S3.** Structural model (a) top view of 1T'-MoS<sub>2</sub> and (b, c) top and side views of 1T'-MoS<sub>2</sub>/MoO<sub>x</sub>. (c) The band structure and (d) density of state of 1T'-MoS<sub>2</sub>/MoO<sub>x</sub>. Atoms are O (red), Mo (aqua), and S (yellow).



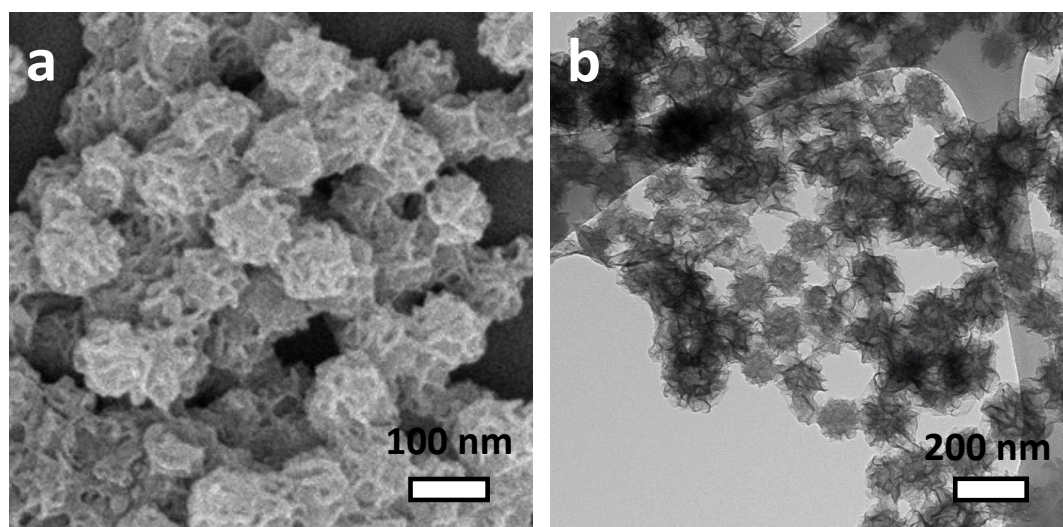

**Figure S4.** (a) SEM and (b) TEM images of HMHSs.

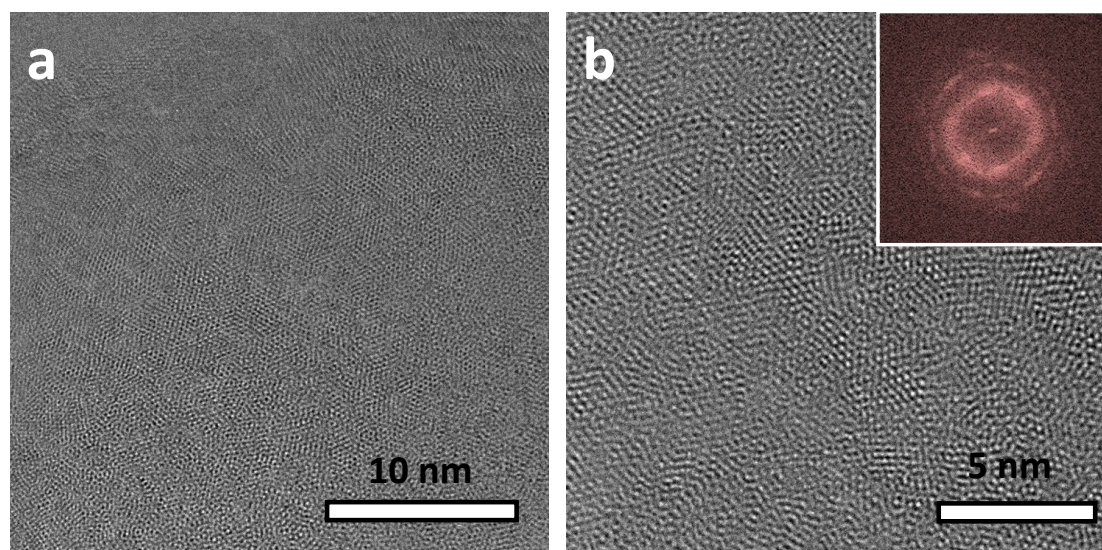

**Figure S5.** HRTEM images of HMHSs.

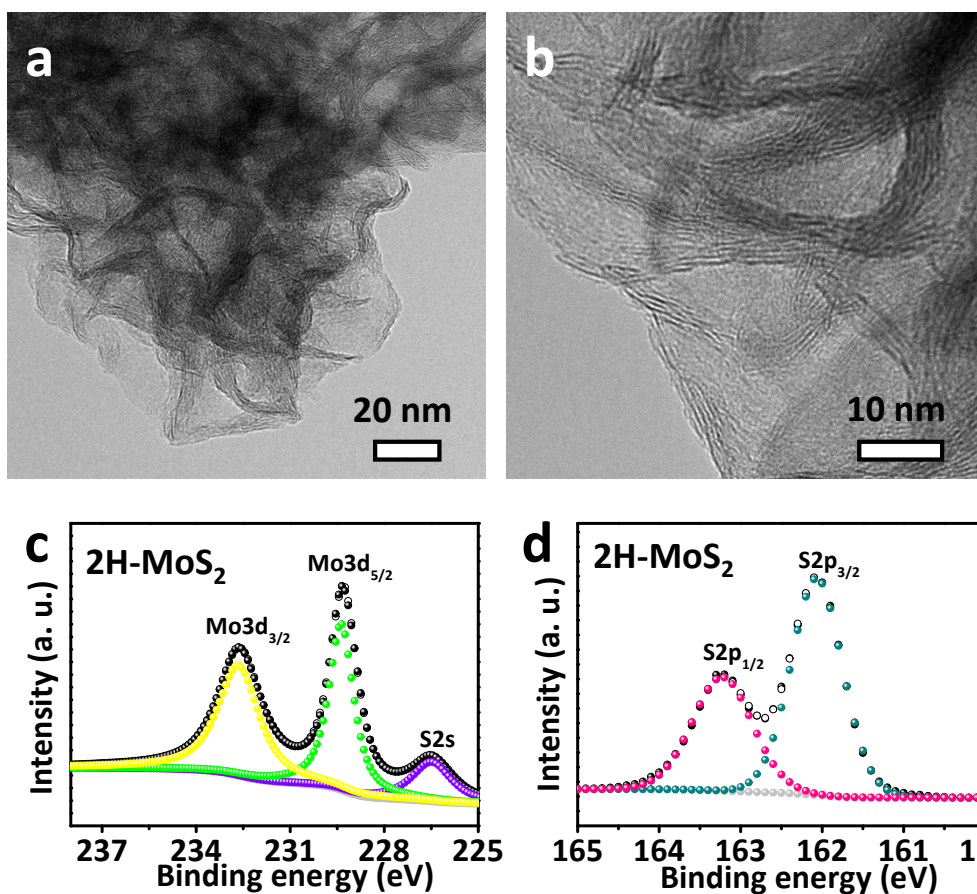

**Figure S6.** (a, b) TEM images of 2H-MoS<sub>2</sub>, (c, d) high-resolution XPS spectra of Mo 3d, S 2p.

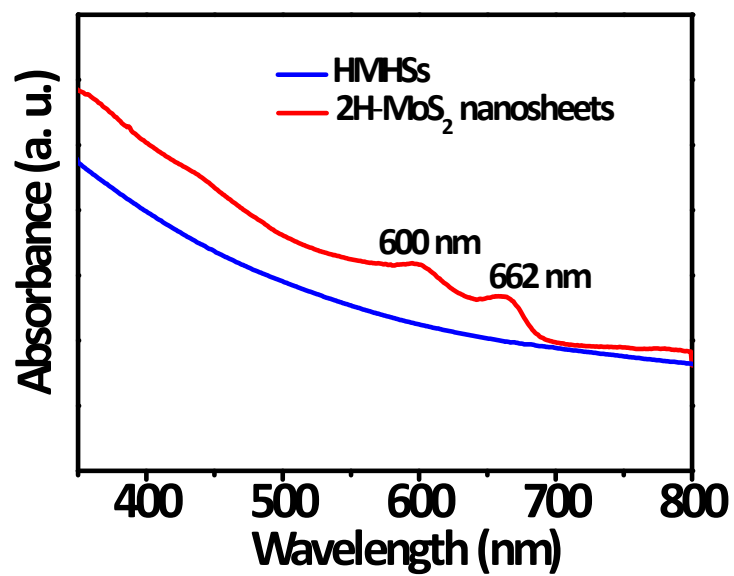

**Figure S7.** UV absorption spectra of HMHSs and 2H MoS<sub>2</sub> nanosheets.



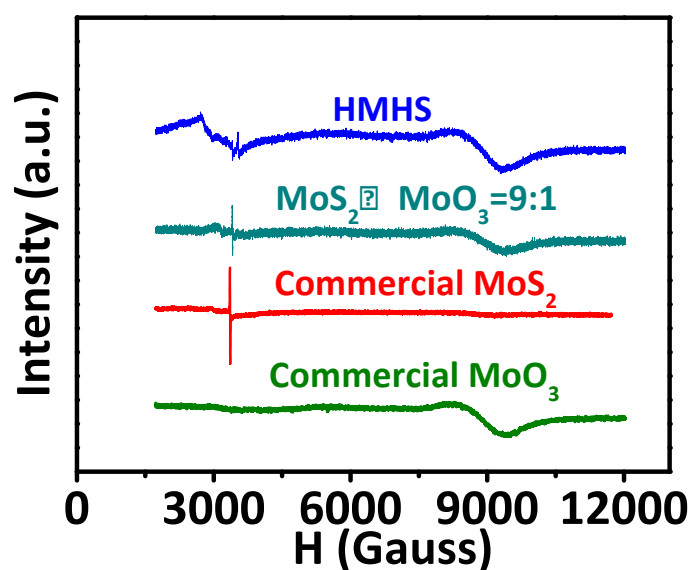

**Figure S8.** (a) EPR spectrum of HMHS, commercial MoS<sub>2</sub>, commercial MoO<sub>3</sub>, MoS<sub>2</sub> and MoO<sub>3</sub> mixture.

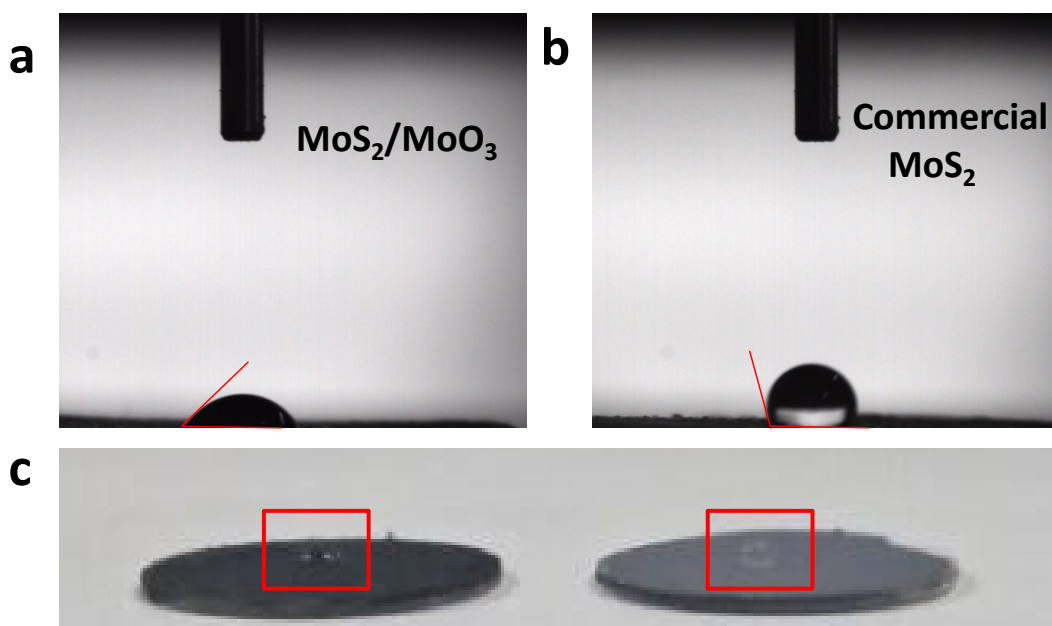

**Figure S9.** Static contact angle images. (a) Fresh HMHSs film. We measured the contact angle by drop casting a droplet of water (5  $\mu$ L) on the HMHSs film and obtained an angle of 45°. (b) Commercial MoS<sub>2</sub> film. The same experiments were done on the commercial MoS<sub>2</sub> films and an angle of 110° was found. These results confirm the hydrophilic surface of HMHSs and hydrophobic surface of commercial MoS<sub>2</sub>. (c) Optical images of the HMHSs and commercial MoS<sub>2</sub> on Glass pieces

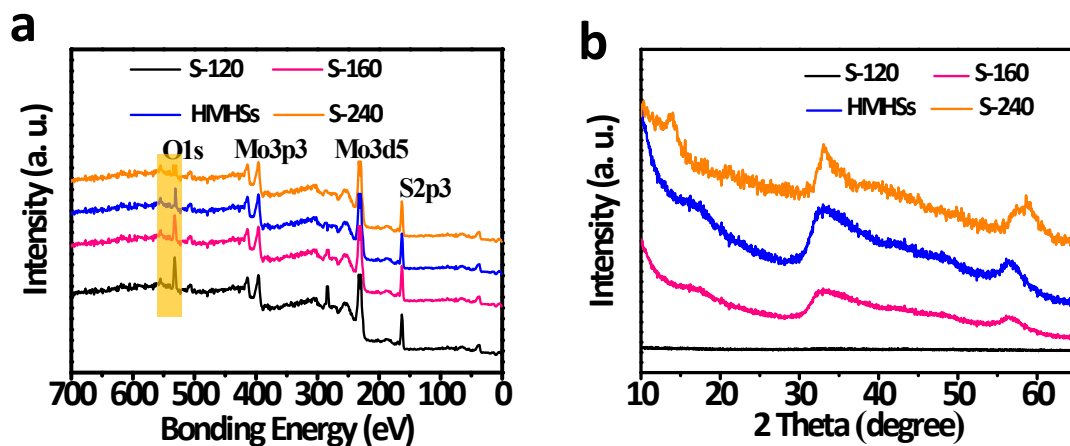

**Figure S10.** (a) XPS spectra and (b) XRD patterns of the S-120, S-160, HMHSs and S-240.

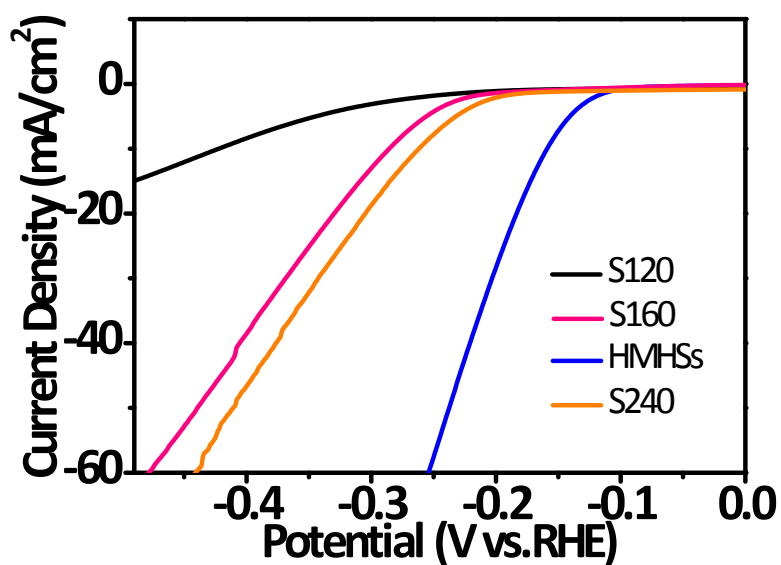

**Figure S11.** Polarization curves of Samples at different temperatures.

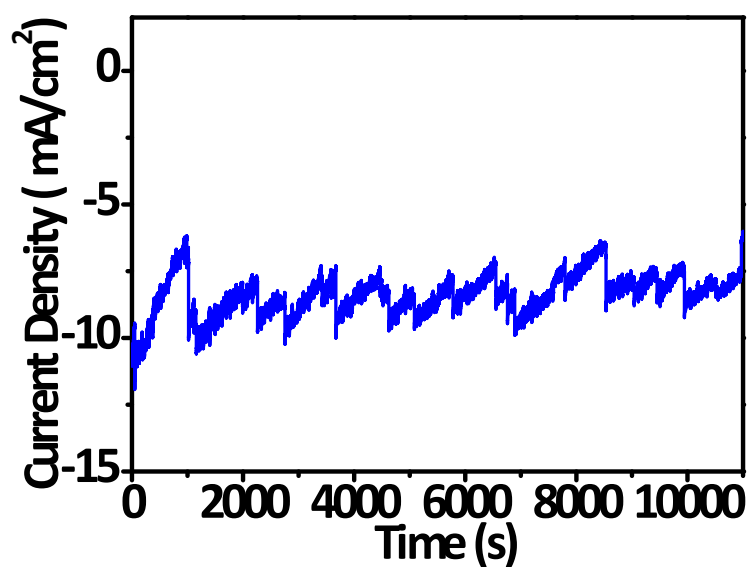

**Figure S12.** Time dependence of current density under static overpotential of 120 mV.

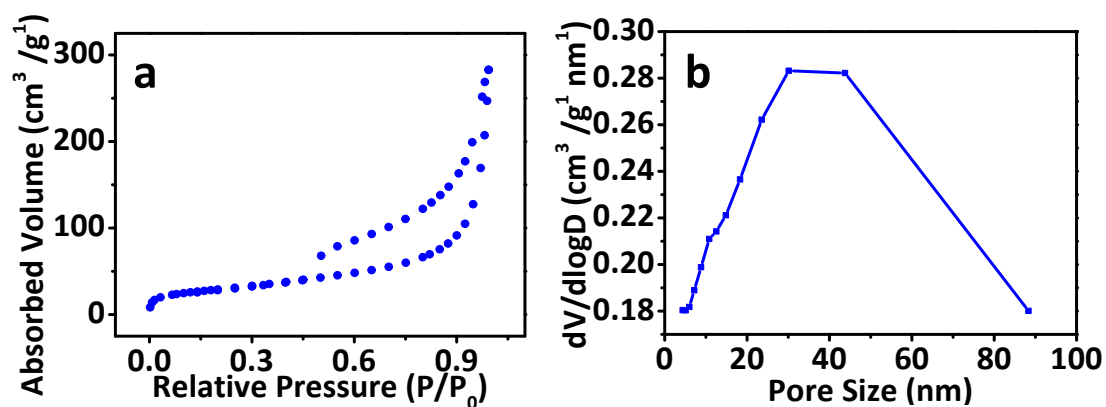

**Figure S13.** (a) BET nitrogen adsorption and desorption isotherms and (b) pore size distribution of the HMHSs.

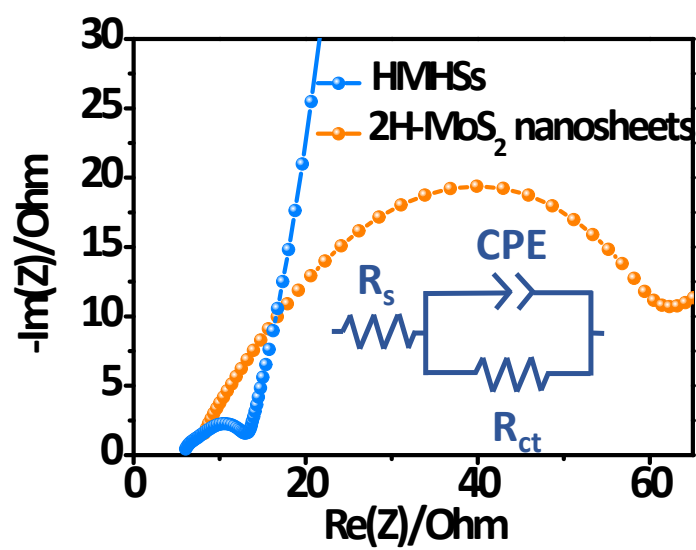

**Figure S14.** Nyquist plots of electrochemical impedance spectra (EIS) of HMHSs and 2H-MoS<sub>2</sub> nanosheets. The *inset* is the equivalent electrical circuit.

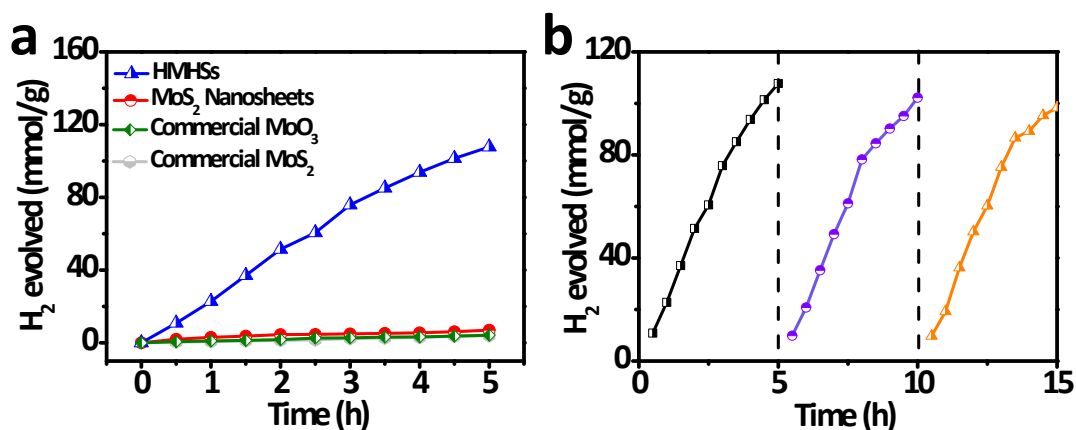

**Figure S15.** (a) Photocatalytic H<sub>2</sub> evolved of HMHS, MoS<sub>2</sub> nanosheets, commercial MoS<sub>2</sub> and MoO<sub>3</sub>. (b) Time course of H<sub>2</sub> evolved of HMHSs.

In photocatalytic hydrogen production test, the mixture of eosin, triethanolamine, and deionized water was applied as the reaction medium with 300 W xenon lamp as a light source. **Figure S15a** demonstrates the HMHSs evolved the highest H<sub>2</sub> production of 22.108 mmol g<sup>-1</sup> h<sup>-1</sup>. For comparison, we also tested the hydrogen production properties of commercial MoS<sub>2</sub>, MoS<sub>2</sub> nanosheets and MoO<sub>3</sub> nanosheets, HMHSs is 20 times higher than MoS<sub>2</sub> nanosheets, 27 times higher than commercial MoS<sub>2</sub> and 28 times higher than MoO<sub>3</sub> nanosheets. The stability test (**Figure S15b**) showed that the reduction in photocatalytic performance was negligible after 15 h of the reaction, suggesting its good durability. We hypothesize that good performance is due to the fact that nanospheres favors exposure to more active sites and the synergistic effect of molybdenum sulfide and molybdenum oxide. A more detailed explanation is as follows: While the metallic character of 1T-MoS<sub>2</sub> may be good for enhancing electrical conductivity, it is unfavourable for the separation of photogenerated charge carriers. Similarly, the wide  $E_g$  of MoO<sub>3</sub> is unsuitable for enhancing electrocatalytic or photocatalytic properties due to its poor conductivity of ionic species. Interestingly, by coupling MoO<sub>3</sub> with 1T-MoS<sub>2</sub>, it utilizes the best properties of each component while mitigating their deficiencies, and thus realizes an effective enhancement of visible-light-driven H<sub>2</sub> evolution activity. What more,

the fascinating hollow structure of HMHSs provides a high BET surface area, which facilitates the exposure of more active sites to promote catalytic performance. To compare the catalytic activity of the HMHSs with those of the recently reported for Molybdenum sulfide-based catalytic, the hydrogen production rate and TOF are summarized in **Table S7**, which show our catalytic have a better catalytic capacity.



**Table S1** The  $\Delta G$  (H\*) values of the H\* adsorbed on the surface of different models.

| <b>Models</b>          | HMHSs     | MoO <sub>3</sub> | 1T-MoS <sub>2</sub> | bulk MoS <sub>2</sub> |
|------------------------|-----------|------------------|---------------------|-----------------------|
| $\Delta G(\text{H}^*)$ | ~0.126 eV | ~0.488 eV        | ~0.283 eV           | ~0.34 eV              |

**Table S2** Lattice parameters (Å) of supercells for all model systems.

| <b>Model catalyst</b>                  | <b>a</b> | <b>b</b> | <b>c</b> |
|----------------------------------------|----------|----------|----------|
| MoO <sub>3</sub>                       | 10.800   | 9.470    | 20.097   |
| 1T-MoS <sub>2</sub>                    | 15.815   | 11.245   | 23.477   |
| 1T'-MoS <sub>2</sub> /MoO <sub>x</sub> | 16.001   | 11.245   | 28.124   |

**Table S3.** Catalytic activity comparison samples with respect to 1T'-MoS<sub>2</sub>/MoO<sub>3</sub> with different mass ratios.

| Sample | Mo    | S     | O     | Mass content<br>of MoS <sub>2</sub> (%) | $\eta$ at 5<br>mA/cm <sup>2</sup> (V) |
|--------|-------|-------|-------|-----------------------------------------|---------------------------------------|
| S-120  | 10.25 | 7.37  | 18.89 | 22.4                                    | 0.341                                 |
| S-160  | 10.12 | 10.88 | 14.04 | 37                                      | 0.253                                 |
| HMHSs  | 9.89  | 13.56 | 9.33  | 54                                      | 0.092                                 |
| S-240  | 9.77  | 18.24 | 1.23  | 98                                      | 0.232                                 |

**Table S4.** Catalytic activity comparison of these nanoframes and the reported nanocatalysts.

| Catalyst                                                | Catalyst loading (mg cm <sup>-2</sup> ) | Tafel slope (mV dec <sup>-1</sup> ) | Current density (j, mA cm <sup>-2</sup> ) | $\eta$ at the corresponding j (mV) | Ref.                                              |
|---------------------------------------------------------|-----------------------------------------|-------------------------------------|-------------------------------------------|------------------------------------|---------------------------------------------------|
| <b>HMHSs</b>                                            | <b>0.2</b>                              | <b>42</b>                           | <b>10</b>                                 | <b>~109</b>                        | <b>In this work</b>                               |
| Ultrathin MoS <sub>2</sub> Nanoplates                   | 0.136                                   | 53                                  | 10                                        | ~155                               | <i>ACS Appl. Mater. Interfaces</i> 2013, 5, 12794 |
| MoS <sub>2</sub> nanosheets                             | 0.0002                                  | 60                                  | 10                                        | ~250                               | <i>Nat. Mater.</i> 2013, 12, 850                  |
| Oxygen incorporated MoS <sub>2</sub>                    | 0.285                                   | 55                                  | 10                                        | ~180                               | <i>J. Am. Chem. Soc.</i> 2013, 135, 17881         |
| MoS <sub>2</sub> nanosheets                             | 0.05                                    | 40                                  | 10                                        | ~200                               | <i>Nano Lett.</i> 2013, 13, 6222                  |
| MoS <sub>2</sub> nanofilm                               | 0.12                                    | 51                                  | 10                                        | ~235                               | <i>Adv. Mater.</i> 2014, 26, 2683                 |
| MoO <sub>2</sub> -supported MoS <sub>2</sub> nanosheets | 0.22                                    | 76.1                                | 10                                        | ~220                               | <i>Nanoscale</i> , 2015, 7, 5203                  |
| column-like MoS <sub>2</sub> nanosheets                 | 0.40                                    | 39                                  | 10                                        | ~200                               | <i>Chem. Mater.</i> 2016, 28, 2074                |
| GCNF@MoS <sub>2</sub>                                   | 0.2                                     | 49.6                                | 10                                        | ~200                               | <i>Electrochim. Acta</i> , 2016, 219, 604         |
| Pt-MoS <sub>2</sub>                                     | 0.201                                   | 96                                  | 10                                        | ~210                               | <i>Energy Environ. Sci.</i> , 2015, 8, 1594       |
| MoO <sub>3</sub> -MoS <sub>2</sub> Nanowires            | 0.2                                     | 55                                  | 10                                        | ~310                               | <i>Nano Lett.</i> 2011, 11, 4168                  |
| graphene/MoS <sub>2</sub>                               | Ca. 1.86                                | 47                                  | 50                                        | ~200                               | <i>RSC Adv.</i> , 2016, 6, 31359                  |

**Table S5.** Catalytic durability comparison of these nanoframes and the reported nanocatalysts.

| Catalyst                                                | Cycle number | $\eta_{10}(\text{mV})$    | IT test time (s) | IT test result                               | Ref.                                              |
|---------------------------------------------------------|--------------|---------------------------|------------------|----------------------------------------------|---------------------------------------------------|
| HMHSs                                                   | 3000         | negligible decay          | 10000            | Current density reduced by 8.6%              | In this work                                      |
| Ultrathin MoS <sub>2</sub> Nanoplates                   | 2000         | negligible decay          | -                | -                                            | <i>ACS Appl. Mater. Interfaces</i> 2013, 5, 12794 |
| WS <sub>2</sub> nanosheets                              | 10000        | remain stable             | -                | -                                            | <i>Nat. Mater.</i> 2013, 12, 850                  |
| Oxygen incorporated MoS <sub>2</sub>                    | 3000         | negligible difference     | 20000            | slight degradation                           | <i>J. Am. Chem. Soc.</i> 2013, 135, 17881         |
| MoS <sub>2</sub> nanosheets                             | -            | -                         | -                | -                                            | <i>Nano Lett.</i> 2013, 13, 6222                  |
| MoS <sub>2</sub> nanofilm                               | 1000         | remain stable             | 21000            | stable high current density                  | <i>Adv. Mater.</i> 2014, 26, 2683                 |
| MoO <sub>2</sub> -supported MoS <sub>2</sub> nanosheets | 1000         | remained almost unchanged | 36000            | reduction currents remained almost invariant | <i>Nanoscale</i> , 2015, 7, 5203                  |
| column-like MoS <sub>2</sub> nanosheets                 | 1000         | few changes               | -                | -                                            | <i>Chem. Mater.</i> 2016, 28, 2074                |
| GCNF@MoS <sub>2</sub>                                   | -            | -                         | 36000            | Current density reduced by 18.7%             | <i>Electrochim. Acta</i> , 2016, 219, 604         |
| Pt-MoS <sub>2</sub>                                     | 5000         | a very stable performance | -                | -                                            | <i>Energy Environ. Sci.</i> , 2015, 8, 1594       |
| MoO <sub>3</sub> -MoS <sub>2</sub> Nanowires            | 10000        | No degradation            | -                | -                                            | <i>Nano Lett.</i> 2011, 11, 4168                  |
| graphene/MoS <sub>2</sub>                               | 1000         | little current lost       | 3000             | reduction currents remained almost invariant | <i>RSC Adv.</i> , 2016, 6, 31359                  |

**Table S6.** Catalytic activity comparison of the HMHSs, molybdenum compounds and other non-precious metal catalysts.

| Catalyst                                 | Catalyst loading (mg cm <sup>-2</sup> ) | Tafel slope (mV dec <sup>-1</sup> ) | Current density (j, mA cm <sup>-2</sup> ) | η at the corresponding j (mV) | Ref.                                                |
|------------------------------------------|-----------------------------------------|-------------------------------------|-------------------------------------------|-------------------------------|-----------------------------------------------------|
| <b>HMHSs</b>                             | <b>0.2</b>                              | <b>42</b>                           | <b>10</b>                                 | <b>~109</b>                   | <b>In this work</b>                                 |
| ①MoS <sub>2</sub> nanomesh               | 0.28                                    | 46                                  | 10                                        | ~160                          | <i>10.1016/j.apcatb.2018.05.080</i>                 |
| ②NiCoMo film                             | -                                       | 65.3                                | 10                                        | ~35                           | <i>ACS Appl. Mater. Interfaces</i> , 2017, 9, 22420 |
| ③MoSe <sub>2</sub> /MoO <sub>2</sub> /Mo | -                                       | 48.9                                | 10                                        | ~142                          | <i>Small</i> 2018, 14, 1703798                      |
| ④MoP/CNT-700                             | 0.5                                     | 60                                  | 10                                        | ~83                           | <i>Adv. Funct. Mater.</i> 2018, 28, 1706523         |
| ⑤NC-Co <sub>0.85</sub> Se                | 0.57                                    | 34.1                                | 30                                        | ~210                          | <i>Electrochim. Acta</i> , 2017, 247, 468           |
| ⑥W <sub>x</sub> C/NG-10                  | 0.5659                                  | 45.91                               | 10                                        | ~77.82                        | <i>Electrochim. Acta</i> , 2017, 251, 660           |
| ⑦C-WP/W                                  | -                                       | 79.8                                | 10                                        | ~109                          | <i>Chem. Eng. J.</i> , 2017, 327, 705               |
| ⑧GNS                                     | 0.28                                    | 35.8                                | 25                                        | ~290                          | <i>Electrochim. Acta</i> , 2018, 283, 1146e1153     |
| ⑨Petaloid FeP/C                          | 0.28                                    | 57                                  | 10                                        | ~110                          | <i>Electrochem. Commun.</i> , 2018, 92, 33          |
| ⑩ZnSe/MoSe <sub>2</sub>                  | 0.75                                    | 73                                  | 10                                        | ~200                          | <i>Adv. Mater. Interfaces</i> , 2017, 1700948       |

**Table S7. Activity of catalyst in terms of yield of H<sub>2</sub> evolved and TOF.**

| Photocatalyst                                | Light source  | Activity[mmol g <sup>-1</sup> h <sup>-1</sup> ] | TOF <sup>[a]</sup> [h <sup>-1</sup> ] | Ref.                                               |
|----------------------------------------------|---------------|-------------------------------------------------|---------------------------------------|----------------------------------------------------|
| HMHS                                         | 300 W Xe lamp | 22                                              | 5.25                                  | In this work                                       |
| Colloidal MoS <sub>2</sub>                   | 300 W Xe lamp | -                                               | 6                                     | <i>Chem. Commun.</i> 2009, 0, 4536.                |
| MoS <sub>2</sub> /CdS                        | 300 W Xe lamp | 5.3                                             | ca. 0.7                               | <i>J. Am. Chem. Soc.</i> 2008, 130, 7176           |
| CdSe-MoS <sub>2</sub>                        | 300 W Xe lamp | 0.8                                             | ca. 0.15                              | <i>J. Phys. Chem. C</i> 2010, 114, 10628           |
| MoS <sub>2</sub> /SiO <sub>2</sub>           | Hg Lamp       | 0.86                                            | ca. 0.14                              | <i>J. Catal.</i> 1991, 131, 156                    |
| MoS <sub>2</sub> /TiO <sub>2</sub>           | 300 W Xe lamp | 0.03                                            | ca. 0.005                             | <i>J. Colloid Interface Sc.</i> 2011, 354, 607     |
| TiO <sub>2</sub> /MoS <sub>2</sub> /graphene | 300 W Xe lamp | 2.1                                             | ca. 0.35                              | <i>J. Am. Chem. Soc.</i> 2012, 134, 6575           |
| MoS <sub>x</sub> C <sub>y</sub>              | 300 W Xe lamp | 19                                              | ca. 0.3                               | <i>Dalton Trans.</i> 2013, 42, 1287                |
| MoS <sub>2</sub> /RGO                        | 300 W Xe lamp | 4.19                                            | 1.00                                  | <i>J. Phys. Chem. C</i> 2012, 116, 25415           |
| p-MoS <sub>2</sub> /n-RGO                    | 300 W Xe lamp | 0.025                                           | 0.006                                 | <i>J. Am. Chem. Soc.</i> 2013, 135, 10286          |
| MoS <sub>2</sub> /TiO <sub>2</sub>           | 300 W Xe lamp | 0.75                                            | 0.18                                  | <i>Phys. Chem. Chem. Phys.</i> 2015, 17, 933       |
| TiO <sub>2</sub> /MoS <sub>2</sub> /G        | 350 W Xe lamp | 2.07                                            | 0.49                                  | <i>J. Am. Chem. Soc.</i> , 2012, 134 (15), pp 6575 |
| TiO <sub>2</sub> @MoS <sub>2</sub>           | 300 W Xe lamp | 1.68                                            | 0.40                                  | <i>Appl. Catal. B</i> 2015, 164, 1                 |
| 1T MoS <sub>2</sub>                          | 100 W halogen | 26                                              | 6.2                                   | <i>Angew. Chem. Int. Ed.</i> 2013, 52, 13057       |
| MoS <sub>2</sub> -NH <sub>3</sub>            | 150 W halogen | 0.171                                           | 0.04                                  | <i>J. Alloy Compd.</i> 2016, 688, 368              |



## References

1. M. Segall, P. J. Lindan, M. Probert, C. Pickard, P. Hasnip, S. Clark and M. Payne, *J. Phys. Condens. Matter*, 2002, **14**, 2717-2744.
2. J. K. Nørskov, T. Bligaard, A. Logadottir, J. R. Kitchin, J. G. Chen, S. Pandalov and U. Stimming, *J. Electrochem. Soc.*, 2005, **152**, J23-J26.
3. Y. Liu, G. Yu, G. D. Li, Y. Sun, T. Asefa, W. Chen and X. Zou, *Angew. Chem. Int. Ed.*, 2015, **54**, 10752-10757.
